# Supplementary material
Source: publisher figshare collection journal article supplement (https://gsapubs.figshare.com/ndownloader/files/23317631)
Supplement: Supplementary file 1 [file 23317631]

## Sheet: Table DR1
TABLE DR1. MAJOR-OXIDE AND TRACE-ELEMENT ANALYSES OF THE BURNEY MOUNTAIN DACITE DOME COMPLEX
Sample	B15DD025	LC98-2327*	LF81-18-12*	LM81-1108*	LM81-1110*	LM82-1223*	LM82-1227*	LM82-1228*	B15DD029	B16DD066	LF81-34*	LF81-90*	LF81-121*	B15DD027	B15DD028	LM79-574*	LM81-1133*	B16DD067	LM79-576*	B16DD063	B16DD064	LM79-536*	LM79-573*	LMm81-338*	LM81-1075*	LM81-1083*	LM81-1168A*	B16DD060A	B16DD060B	B16DD060C	B16DD061A	B16DD061B	LM81-1151*
Unit	db1	db1	db1	db1	db1	db1	db1	db1	db2	db2	db2	db2	db2	db3	db3	db3	db3	db4	db4	db5	db5	db5	db5	db5	db5	db5	db5	db6	db6	db6	db6	db6	db6
Lat. (N)	40.8720°	40.8727°	40.8643°	40.8724°	40.8591°	40.8785°	40.8432°	40.8445°	40.8100°	40.8136°	40.8471°	40.8215°	40.8168°	40.7822°	40.7823°	40.8014°	40.7822°	40.8024°	40.8034°	40.8018°	40.8019°	40.7818°	40.8019°	40.8172°	40.7904°	40.8177°	40.7844°	40.8065°	40.8065°	40.8065°	40.8058°	40.8058°	40.8089°
Long. (W)	121.6235°	121.6241°	121.6262°	121.6237°	121.6220°	121.6202°	121.6260°	121.6285°	121.6593°	121.6572°	121.6479°	121.6503°	121.6426°	121.6407°	121.6555°	121.6332°	121.6397°	121.6622°	121.6443°	121.6273°	121.6286°	121.6245°	121.6232°	121.6242°	121.6034°	121.6069°	121.6076°	121.6267°	121.6267°	121.6267°	121.6275°	121.6275°	121.6263°
weight %
SiO2	63.9106	63.6646	63.1895	63.4871	63.4434	63.0531	62.2122	63.4071	63.558	63.8669	63.5035	64.0276	63.7938	62.9712	62.1466	63.5472	63.3634	63.498	63.9676	64.7176	64.7605	63.5636	64.2178	63.5663	63.8911	64.0641	64.0476	64.7017	64.6659	64.5946	64.5869	64.4967	64.0641
TiO2	0.520129	0.530371	0.520573	0.510459	0.550551	0.520521	0.560561	0.560504	0.523005	0.512561	0.570571	0.50045	0.49049	0.549044	0.619273	0.510459	0.510511	0.520317	0.510459	0.520689	0.518744	0.500501	0.510459	0.570685	0.510408	0.510511	0.510459	0.550821	0.544999	0.51622	0.521382	0.519702	0.530531
Al2O3	16.4978	16.6416	16.8385	16.6049	16.5766	16.9069	17.3574	16.5349	17.0183	16.7687	17.0971	16.645	16.7868	17.6863	16.6619	17.1855	16.5966	16.4644	16.3948	16.8803	16.8337	17.2372	17.1955	17.1606	16.9135	16.5966	16.9953	16.8228	16.8684	16.7829	16.8459	16.8568	17.2072
FeO*	4.55004	4.48314	4.57503	4.52407	4.5045	4.49449	4.69469	4.51406	4.55129	4.52473	4.47447	4.37394	4.34434	4.665	5.24765	4.41397	4.54454	4.55747	4.46402	4.38275	4.36959	4.33433	4.27385	4.45535	4.29343	4.33433	4.38395	4.47677	4.48919	4.36871	4.36797	4.34144	4.4044
FeO	3.64003	3.58651	3.66003	3.61926	3.6036	3.5956	3.75576	3.61125	3.64103	3.61979	3.57958	3.49915	3.47548	3.732	4.19812	3.53118	3.63564	3.64598	3.57121	3.5062	3.49567	3.46747	3.41908	3.56428	3.43475	3.46747	3.50716	3.58142	3.59136	3.49497	3.49437	3.47315	3.52352
Fe2O3	1.01394	0.999028	1.01951	1.00815	1.00379	1.00156	1.04617	1.00592	1.01421	1.0083	0.997097	0.974693	0.968099	1.03955	1.16939	0.983615	1.01271	1.01559	0.994767	0.976656	0.973725	0.965868	0.952389	0.992835	0.956754	0.965868	0.976924	0.997609	1.00038	0.973528	0.973363	0.967453	0.981483
MnO	0.0863152	0.090063	0.0800881	0.0800721	0.0800801	0.0800801	0.0800801	0.0800721	0.0864267	0.0854707	0.0800801	0.0800721	0.0800801	0.0884791	0.0984206	0.0700631	0.0800801	0.0876152	0.0800721	0.0794922	0.0798448	0.0700701	0.0700631	0.0800961	0.0800641	0.0800801	0.0700631	0.080834	0.0782149	0.0786377	0.0805367	0.080206	0.0800801
MgO	2.95991	3.06214	3.07338	3.14283	3.14314	3.1031	3.09309	3.14283	2.80422	2.77991	2.4024	2.75248	2.88288	2.67024	3.5043	2.52227	3.19319	2.93547	2.98268	2.23387	2.18364	2.63263	2.24202	2.42291	2.66213	2.8028	2.37213	2.03771	2.07649	2.27643	2.24904	2.28555	2.17217
CaO	5.75561	5.79406	5.9065	5.83525	5.76577	5.97598	6.2963	5.75518	5.80005	5.7729	5.64565	5.75518	5.76577	5.78873	6.0988	5.89531	5.91592	5.83416	5.82524	5.35021	5.41392	5.86587	5.58503	5.56668	5.69456	5.67568	5.47493	5.33125	5.30723	5.49046	5.48926	5.53977	5.53554
Na2O	3.32032	3.2923	3.4538	3.41307	3.6036	3.5035	3.55355	3.58322	3.43766	3.402	3.7037	3.54319	3.5035	3.39424	3.35109	3.6633	3.53353	3.5881	3.43309	3.62084	3.6379	3.5035	3.71334	3.65439	3.44275	3.47347	3.50315	3.79962	3.76269	3.65533	3.61847	3.63939	3.86386
K2O	2.28675	2.2816	2.25248	2.28205	2.2022	2.24224	2.02202	2.30207	2.11259	2.17491	2.38238	2.21199	2.23223	2.07491	2.0987	2.08187	2.13213	2.3961	2.222	2.10701	2.09521	2.17217	2.07186	2.37285	2.39191	2.35235	2.51226	2.08263	2.09299	2.12677	2.1316	2.12888	2.02202
P2O5	0.112488	0.160112	0.110121	0.120108	0.13013	0.12012	0.13013	0.120108	0.10839	0.111915	0.14014	0.110099	0.12012	0.111929	0.173303	0.110099	0.13013	0.118389	0.120108	0.107288	0.107006	0.12012	0.120108	0.15018	0.120096	0.11011	0.130117	0.115834	0.113893	0.109925	0.108864	0.111588	0.12012
LOI	0.755955	0.57	0.94	0.96	1.01	0.67	0.54	1.04	0.502772	0.527125	0.72	0.14	0.69	1.22545	0.882353	0.9	0.12	0.957523	0.61	0.309406	0.0108026	0.93	0.26	1.12	0.91	0.9	0.85	0.109457	0.0889977	0.0119861	0.976021	0.95577	0.21
Total	98.7659	99.93	99.89	99.91	99.9	99.9	99.9	99.91	98.7542	99.0881	99.9	99.91	99.9	98.5132	98.3346	99.91	99.9	98.4894	99.91	99.2456	99.8017	99.9	99.91	99.88	99.92	99.9	99.91	98.9782	99.4529	99.4039	98.2409	98.1869	99.9
FeO*/MgO	1.53722	1.46405	1.4886	1.43949	1.43312	1.44839	1.5178	1.43631	1.62301	1.62765	1.8625	1.58909	1.50694	1.74704	1.49749	1.75	1.4232	1.55255	1.49664	1.96195	2.00106	1.64639	1.90625	1.83884	1.61278	1.54643	1.8481	2.19696	2.16191	1.91911	1.94215	1.89952	2.02765
ppm
Ni	33.4	---	---	---	---	---	---	---	27.4	26.4315	---	---	---	21.306	29.346	---	---	30.0879	---	14.5725	14.7735	---	---	---	---	---	---	10.1505	12.9645	15.879	12.9	14.1705	---
Cr	54.6	---	61.3	63.3	62.75	56.25	37.9	63.2	35.4	39.4965	9.69	37.4	35.7	25.8285	84.1185	8.53	64.5	54.7143	57.6	5.427	5.025	11	3.9	6.4	20.2	51.1	6.3	3.3165	3.1155	4.824	5.3	5.226	3.46
Sc	14.3	---	15.6	15	14.9	14.85	15.6	15.15	15.5	15.075	14.7	15.2	14.3	15.276	16.7835	14.7	15	15.3915	15.8	13.3665	14.07	14	14.3	13.6	13.9	14.8	12.9	14.472	14.3715	13.869	14.3	13.7685	14.1
V	116.6	---	---	---	---	---	---	---	118.4	112.359	---	---	---	116.781	125.524	---	---	115.486	---	115.675	116.982	---	---	---	---	---	---	121.303	121.504	115.374	115.6	116.58	---
Ba	760.4	---	704	804	767	791	756	794	849.8	792.844	859	804	822	814.954	743.197	727	770	767.092	787	724.906	722.595	731	739	914	810	786	867	714.454	713.65	722.394	709.7	713.248	716
Rb	60.5775	---	59.6	64	64	62	58	64.5	47.477	56.727	65.7	62.3	67	52.173	52.569	58.9	62	61.2228	63.6	61.281	60.291	58	63.2	72	65	66.7	69	60.786	60.489	60.984	60.085	58.905	58.2
Sr	407.7	---	411	---	---	---	---	---	418.8	418.783	467	411	---	445.516	439.386	424	---	411.4	436	414.562	419.185	---	436	---	---	403	---	424.813	429.436	422.301	417.5	419.185	464
Zr	129.168	---	120	140	135	119	108	133	132.704	132.192	127	113	120	132.088	138.985	104	<300	129.125	124	123.937	124.668	120	110	210	190	121	<300	124.25	124.877	124.564	123.552	121.325	114
Y	17.4	---	---	---	---	---	---	---	16.6	17.9895	---	---	---	17.5875	19.497	---	---	17.6754	---	16.683	17.688	---	---	---	---	---	---	18.5925	17.889	17.688	16.6	16.683	---
Nb	4.3	---	---	---	---	---	---	---	5.1	5.226	---	---	---	5.025	5.7285	---	---	4.6671	---	4.1205	4.623	---	---	---	---	---	---	4.3215	4.7235	4.7235	4.6	4.221	---
Ga	15.9	---	---	---	---	---	---	---	16.6	16.9845	---	---	---	18.09	16.482	---	---	17.2782	---	16.9845	17.487	---	---	---	---	---	---	17.5875	16.9845	18.3915	17.2	17.487	---
Cu	34.4	---	---	---	---	---	---	---	43.4	38.592	---	---	---	31.959	34.773	---	---	31.5774	---	35.778	33.366	---	---	---	---	---	---	26.934	40.803	41.808	15	14.673	---
Zn	54.7	---	---	65	57.5	58	59	61	54.9	54.5715	---	---	58	57.486	60.702	---	61	55.2108	---	54.672	52.9635	68	---	66	56	---	61	59.295	55.5765	56.7825	52.3	53.868	---
Pb	13	---	---	---	---	---	---	---	12.8	13.668	---	---	---	12.9645	11.055	---	---	12.3132	---	11.457	10.854	---	---	---	---	---	---	13.7685	12.663	11.457	12.5	11.5575	---
La	17.4	---	18.4	20	19.5	19.5	20.5	20.5	16.5	17.286	21.4	18.7	19	20.4015	18.9945	17	20	16.7817	18.7	17.7885	18.291	18	17.5	22	20	18.4	20	15.879	17.889	17.688	16.1	15.276	17.6
Ce	37.8	---	37.5	35	35	34.5	35	35	37.4	36.381	43.2	35.4	36	39.8985	40.401	33.7	34	39.9186	36.2	35.2755	34.8735	33	33.1	40	35	35.3	35	35.8785	34.974	36.6825	32.4	37.4865	31.7
Th	6.6	---	6.65	6.8	6.6	6.5	6.2	6.7	7	7.7385	7.12	7.01	7	6.9345	6.3315	6.24	6.2	7.7454	6.63	6.9345	7.437	6.5	6.72	7	6.8	6.79	7	6.432	7.638	6.834	6.2	6.633	6.5
Nd	16.9	---	16.4	17	17.5	17	17.5	17	15.9	17.286	17.9	17.9	21	16.482	16.683	14.7	17	14.1006	17	15.3765	15.678	13	13.7	17	17	16.7	17	16.482	16.884	15.477	17	15.5775	15.1
U	2.9	---	1.25	2.1	2.05	2.05	1.9	2	1.3	1.809	2.62	2.44	2.4	3.417	2.01	2.23	2.7	2.3832	2.37	3.9195	4.221	1.9	2.43	3.3	2.2	2.44	2.4	4.02	2.9145	3.1155	2.2	2.814	2.33
Co	---	---	15.8	15.5	15.45	15.25	16.2	15.5	---	---	14.3	14.8	14.5	---	---	14.3	15.8	---	15.8	---	---	13.9	13.8	13.6	13.8	14.2	12.7	---	---	---	---	---	13.5
Cs	---	---	2.58	2.4	2.4	2.25	2.1	2.4	---	---	2.72	2.77	2.5	---	---	2.76	1.9	---	2.76	---	---	2.5	2.44	2.6	2.6	2.97	2.8	---	---	---	---	---	1.75
Ta	---	---	0.416	0.53	0.465	0.44	0.435	0.47	---	---	0.519	0.462	0.48	---	---	0.404	0.51	---	0.441	---	---	0.42	0.396	0.6	0.52	0.44	0.45	---	---	---	---	---	0.385
Hf	---	---	3.42	3.5	3.4	3.25	3.35	3.45	---	---	3.97	3.47	3.3	---	---	3.18	3.3	---	3.54	---	---	3.2	3.27	3.9	3.3	3.4	3.5	---	---	---	---	---	3.23
Sb	---	---	0.334	0.4	0.7	1.25	1.3	0.85	---	---	0.399	0.43	0.5	---	---	0.269	0.4	---	0.417	---	---	0.04	0.357	0.6	0.5	0.413	0.7	---	---	---	---	---	0.283
Sm	---	---	2.9	3	3.3	3.2	3.3	3.3	---	---	3.77	3.31	2.9	---	---	3.02	2.9	---	3.31	---	---	2.7	3.09	3.5	2.9	3.25	3.1	---	---	---	---	---	3.16
Eu	---	---	0.856	0.79	0.75	0.775	0.81	0.78	---	---	0.957	0.847	0.77	---	---	0.823	0.77	---	0.865	---	---	0.73	0.813	0.89	0.76	0.821	0.77	---	---	---	---	---	0.844
Gd	---	---	3.37	3.9	3.5	3.4	4	3.65	---	---	4.1	2.8	3.6	---	---	2.92	3.3	---	3.34	---	---	3.2	3.24	3.8	3	3.22	4.4	---	---	---	---	---	3.06
Tb	---	---	0.467	0.63	0.53	0.46	0.495	0.51	---	---	0.548	0.485	0.61	---	---	0.464	0.57	---	0.512	---	---	0.6	0.484	0.62	0.59	0.496	0.65	---	---	---	---	---	0.505
Dy	---	---	2.95	---	---	---	---	---	---	---	3.74	3.11	---	---	---	3.01	---	---	3.29	---	---	---	3	---	---	3.01	---	---	---	---	---	---	3.02
Tm	---	---	---	0.31	0.235	0.255	0.235	0.205	---	---	0.271	0.256	0.28	---	---	0.255	0.27	---	0.264	---	---	0.33	0.28	0.29	0.24	0.26	0.28	---	---	---	---	---	0.302
Yb	---	---	1.69	1.6	1.55	1.6	1.5	1.65	---	---	1.79	1.59	1.7	---	---	1.61	1.7	---	1.73	---	---	1.7	1.58	1.8	1.7	1.64	1.8	---	---	---	---	---	1.82
Lu	---	---	0.278	0.26	0.27	0.26	0.265	0.27	---	---	0.315	0.264	0.25	---	---	0.275	0.27	---	0.306	---	---	0.25	0.257	0.29	0.25	0.271	0.26	---	---	---	---	---	0.286
Note: Major-oxide and trace-element analyses were performed on 13 samples by wavelength-dispersive X-ray fluorescence (WD-XRF) at the GeoAnalytical Laboratory at Washington State University in Pullman, Washington (after the methods of Johnson et al., 1999).
Major-oxide analyses were performed on 20 samples (those followed by *) by WD-XRF at the U.S. Geological Survey Analytical Laboratory in Lakewood, Colorado (after the methods of Taggart et al., 1987), and trace-element analyses were performed on the same samples by energy-dispersive XRF (ED-XRF) at the U.S. Geological Survey in Menlo Park, California (after the methods of Webb et al., 1990).
Trace-element analyses were performed on 19 samples (those in italics) by instrumental neutron-activation analysis (INAA) at the U.S. Geological Survey in Reston, Virginia (after the methods of Baedecker and McKown, 1987).
All major-oxide analyses have been recalculated to 100% anhydrous with Fe2O3 = 0.2 total Fe as Fe2O3. Original loss on ignition (LOI) and original oxide totals are given.
